# Supplementary material for: Benefits of dietary supplements on the physical fitness of German Shepherd dogs during a drug detection training course
Source: PubMed Central journal article supplement (PMC6570027; doi:10.1371/journal.pone.0218275), 2019-06-14
Supplement: pone.0218275.s002.pdf [file pone.0218275.s002.pdf]

**S1 Table. Anagraphic data of the dogs**

| <b>Group</b> | <b>ID</b> | <b>Body weight (kg)</b> | <b>Age (years)</b> | <b>Gender</b> |
|--------------|-----------|-------------------------|--------------------|---------------|
| Treated      | 1         | 25.4                    | 3                  | ♀             |
|              | 2         | 22.7                    | 2                  | ♂             |
|              | 3         | 26.1                    | 2                  | ♂             |
|              | 4         | 27.3                    | 2                  | ♂             |
|              | 5         | 18.2                    | 2                  | ♀             |
|              | 6         | 30.5                    | 2                  | ♂             |
|              | 7         | 21.7                    | 2                  | ♂             |
| Control      | 8         | 25.0                    | 2                  | ♀             |
|              | 9         | 28.3                    | 2                  | ♂             |
|              | 10        | 26.6                    | 3                  | ♂             |
|              | 11        | 26.7                    | 2                  | ♂             |
|              | 12        | 30.0                    | 2                  | ♂             |
|              | 13        | 27.1                    | 3                  | ♀             |
|              | 14        | 26.2                    | 2                  | ♂             |
