# Supplementary material for: Benefits of dietary supplements on the physical fitness of German Shepherd dogs during a drug detection training course
Source: PubMed Central journal article supplement (PMC6570027; doi:10.1371/journal.pone.0218275), 2019-06-14
Supplement: pone.0218275.s003.pdf [file pone.0218275.s003.pdf]

**S2 Table. Nutrient composition of base diet**

| <b>Nutrient composition</b> | <b>Amount</b> |
|-----------------------------|---------------|
| Protein (%)                 | 26.0          |
| Fat (%)                     | 17.0          |
| Ash (%)                     | 6.5           |
| Fibre (%)                   | 1.2           |
| ME* (kcal/kg)               | 3794          |
| Vitamin A (UI)              | 15500         |
| Vitamin D3 (UI)             | 1000          |
| E1/Iron (mg/kg)             | 37            |
| E2/Iodine (mg/kg)           | 3.7           |
| E4/Copper (mg/kg)           | 11            |
| E5/Manganese (mg/kg)        | 48            |
| E6/Zinc (mg/kg)             | 145           |
| E8/Selenium (mg/kg)         | 0.06          |

\*Metabolizable Energy was calculated according to NRC (2006)
