# Supplementary material for: Benefits of dietary supplements on the physical fitness of German Shepherd dogs during a drug detection training course
Source: PubMed Central journal article supplement (PMC6570027; doi:10.1371/journal.pone.0218275), 2019-06-14
Supplement: pone.0218275.s004.pdf [file pone.0218275.s004.pdf]

**S3 Table. Nutrient composition of Supplemental treatment**

| <b>Nutrient composition</b> | <b>Amount<br/>(mg/kg)</b> |
|-----------------------------|---------------------------|
| E6/Zinc                     | 3300                      |
| E2/Vitamin C                | 16300                     |
| Vitamin E                   | 16300                     |
| D calcium pantothenate      | 6500                      |
| Vitamin B1                  | 1630                      |
| Vitamin B2                  | 1630                      |
| Vitamin B6                  | 820                       |
| Vitamin B12                 | 16.3                      |
| L-Carnitine                 | 65400                     |
| L- Lysine                   | 41000                     |
| D,L-Methionine              | 41000                     |
| L-Isoleucine                | 39000                     |
| L-Arginine                  | 39000                     |
| L-Valine                    | 49000                     |
| E8/Selenium                 | 6.5                       |
| E1/Carbonato ferroso        | 6845                      |
| Octacosanol                 | 185                       |
