# Supplementary material for: Benefits of dietary supplements on the physical fitness of German Shepherd dogs during a drug detection training course
Source: PubMed Central journal article supplement (PMC6570027; doi:10.1371/journal.pone.0218275), 2019-06-14
Supplement: pone.0218275.s005.pdf [file pone.0218275.s005.pdf]

**S4 Table. Body weight (BW), rectal temperatures, baseline HR and HR means during the different phases of the treadmill in control and treated groups.** Values are medians and interquartile ranges.

| Parameter                                                     | Group             |                   | P value |
|---------------------------------------------------------------|-------------------|-------------------|---------|
|                                                               | Control           | Treated           |         |
| <b>BW (kg) before starting the nutritional treatment (T0)</b> | 26.7 (26.2, 28.3) | 25.4 (21.7, 27.3) | 0.209   |
| <b>BW (kg) after the nutritional treatment (T1)</b>           | 27.0 (26.3, 28.2) | 25.8 (22.0, 27.3) | 0.259   |
| <b>Baseline Rectal temperatures (°C)</b>                      | 38.4 (38.1, 39.0) | 38.7 (38.3, 39.2) | 0.383   |
| <b>Rectal temperatures after treadmill (°C)</b>               | 39.2 (38.9, 39.5) | 39.2 (38.9, 39.5) | 1.000   |
| <b>Rectal temperatures after recovery (°C)</b>                | 39.0 (38.7, 39.0) | 38.7 (38.5, 38.9) | 0.259   |
| <b>Baseline HR (bpm)</b>                                      | 109 (101, 118)    | 95 (93, 106)      | 0.209   |
| <b>HR mean during Phase 1 (bpm)</b>                           | 125 (97, 137)     | 122 (117, 157)    | 0.620   |
| <b>HR mean during Phase 2 (bpm)</b>                           | 127 (100, 139)    | 123 (121, 153)    | 0.620   |
| <b>HR mean during Phase 3 (bpm)</b>                           | 159 (114, 164)    | 142 (138, 158)    | 1.000   |
| <b>HR mean during Phase 4 (bpm)</b>                           | 133 (105, 143)    | 120 (107, 133)    | 0.535   |

Phase 1: 5 min at a 2.5% incline at 3.8 km/h.

Phase 2: 5 min at a 5% incline at 3.8 km/h.

Phase 3: 10 min at a 2.5% incline at 7.0-8.0 km/h.

Phase 4: 7 min of cool down at a 2.5% incline at 3.8 km/h.

P values from Mann-Whitney tests.
