# Supplementary material for: Benefits of dietary supplements on the physical fitness of German Shepherd dogs during a drug detection training course
Source: PubMed Central journal article supplement (PMC6570027; doi:10.1371/journal.pone.0218275), 2019-06-14
Supplement: pone.0218275.s006.pdf [file pone.0218275.s006.pdf]

**S5 Table. Heart rate means according to the phases of treadmill test and recovery**

| Parameter           | Phase of treadmill and recovery |                  |                  |                  |                          | P value* |
|---------------------|---------------------------------|------------------|------------------|------------------|--------------------------|----------|
|                     | Phase 1                         | Phase 2          | Phase 3          | Phase 4          | First 20 min of recovery |          |
| <b>Median (bpm)</b> | 122 <sub>b</sub>                | 123 <sub>b</sub> | 142 <sub>c</sub> | 133 <sub>b</sub> | 96 <sub>a</sub>          | <0.01    |
| <b>IQR (bpm)</b>    | 101-136                         | 106-136          | 125-163          | 106-139          | 83-113                   |          |

IQR= interquartile range

Phase 1: 5 min at a 2.5% incline at 3.8 km/h

Phase 2: 5 min at a 5% incline at 3.8 km/h

Phase 3: 10 min at a 2.5% incline at 7.0-8.0 km/h

Phase 4: 7 min of cool down at a 2.5% incline at 3.8 km/h

\* P value from Friedman tests.

Values not sharing the same subscript are significantly different (P<0.05; Wilcoxon tests).
