# Supplementary material for: Benefits of dietary supplements on the physical fitness of German Shepherd dogs during a drug detection training course
Source: PubMed Central journal article supplement (PMC6570027; doi:10.1371/journal.pone.0218275), 2019-06-14
Supplement: pone.0218275.s007.pdf [file pone.0218275.s007.pdf]

**S6 Table. Parameters and goodness of fit of the third order regression curves used to HRdp determination in each dog.**

| ID dog                | Parameters |           |            |             | Goodness of fit |          |
|-----------------------|------------|-----------|------------|-------------|-----------------|----------|
|                       | B0         | B1        | B2         | B3          | R <sup>2</sup>  | P value  |
| <b>1*</b>             | -          | -         | -          | -           | -               | -        |
| <b>2</b>              | 117.1      | -0.002892 | 8.079e-005 | -7.308e-008 | 0.256           | < 0.0001 |
| <b>3</b>              | 142.3      | -0.09715  | 0.0002575  | -1.418e-007 | 0.770           | < 0.0001 |
| <b>4</b>              | 131.1      | -0.1462   | 0.0004150  | -2.587e-007 | 0.559           | < 0.0001 |
| <b>5</b>              | 114.9      | -0.005188 | 9.832e-005 | -6.553e-008 | 0.858           | < 0.0001 |
| <b>6</b>              | 169.6      | -0.1613   | 0.0003919  | -2.114e-007 | 0.826           | < 0.0001 |
| <b>7</b>              | 89.0       | -0.08894  | 0.0003651  | 0.8721      | 0.866           | < 0.0001 |
| <b>8</b>              | 101.9      | -0.08194  | 0.0002591  | -1.498e-007 | 0.898           | < 0.0001 |
| <b>9</b>              | 161.6      | -0.1200   | 0.0003047  | -1.602e-007 | 0.908           | < 0.0001 |
| <b>10</b>             | 140.6      | -0.09608  | 0.0002811  | -1.572e-007 | 0.797           | < 0.0001 |
| <b>11<sup>#</sup></b> | 65.7       | -0.03111  | 8.776e-005 | -2.731e-008 | 0.619           | < 0.0001 |
| <b>12</b>             | 131.6      | -0.09618  | 0.0002864  | -1.582e-007 | 0.872           | < 0.0001 |
| <b>13</b>             | 143.7      | -0.08847  | 0.0002442  | -1.345e-007 | 0.716           | < 0.0001 |
| <b>14<sup>#</sup></b> | 102.5      | 0.07301   | -0.0001681 | 1.074e-007  | 0.117           | < 0.0001 |

\* The dog refused to walk on the treadmill and was exempted from exercise

# Not used in the HRdp determination because there is no downward inflection
