# Supplementary material for: Benefits of dietary supplements on the physical fitness of German Shepherd dogs during a drug detection training course
Source: PubMed Central journal article supplement (PMC6570027; doi:10.1371/journal.pone.0218275), 2019-06-14
Supplement: pone.0218275.s008.pdf [file pone.0218275.s008.pdf]

**S7 Table. Estimated marginal means  $\pm$  standard error (SE) and P value of Time effect.**

| Parameter | Units    | Time                         |                               |                             | P value for Time effect |
|-----------|----------|------------------------------|-------------------------------|-----------------------------|-------------------------|
|           |          | T1                           | T2                            | T3                          |                         |
| AST       | (U/l)    | 25.0 <sub>a</sub> $\pm$ 0.6  | 25.9 <sub>a</sub> $\pm$ 0.8   | 21.9 <sub>b</sub> $\pm$ 0.6 | <b>&lt;0.001</b>        |
| ALT       | (U/l)    | 44.1 $\pm$ 3.9               | 44.8 $\pm$ 4.3                | 35.3 $\pm$ 3.4              | 0.137                   |
| Glucose   | (mmol/l) | 5.8 <sub>a</sub> $\pm$ 0.1   | 5.6 <sub>a</sub> $\pm$ 0.2    | 5.1 <sub>b</sub> $\pm$ 0.1  | <b>&lt;0.001</b>        |
| LDH       | (U/l)    | 81.8 $\pm$ 8.2               | 74.3 $\pm$ 4.7                | 67.9 $\pm$ 6.0              | 0.392                   |
| NEFA      | (mmol/l) | 0.38 $\pm$ 0.01              | 0.40 $\pm$ 0.01               | 0.41 $\pm$ 0.03             | 0.327                   |
| CK        | (U/l)    | 116.5 <sub>a</sub> $\pm$ 7.6 | 113.7 <sub>ab</sub> $\pm$ 7.4 | 92.3 <sub>b</sub> $\pm$ 4.6 | <b>0.011</b>            |

AST= Aspartate transaminase; ALT= Alkaline Phosphatase; LDH=Lactate dehydrogenase; NEFA= Non-esterified fatty acids; CK= Creatine kinase.

Values in the same row not sharing the same subscript are significantly different ( $P < 0.05$ , Sidak correction).

Bold P-values are significant at the 0.05 level.
